# Supplementary material for: CRISPR/Cas9-Mediated Enrichment Coupled to Nanopore Sequencing Provides a Valuable Tool for the Precise Reconstruction of Large Genomic Target Regions
Source: MDPI journal article supplement (doi:10.3390/ijms24021076), 2023-01-05

# CRISPR/Cas9-Mediated Enrichment Coupled to Nanopore Sequencing Provides a Valuable Tool for the Precise Reconstruction of Large Genomic Target Regions

**Giulia Lopatriello** <sup>1,†</sup>, **Simone Maestri** <sup>1,†</sup>, **Massimiliano Alfano** <sup>1</sup>, **Roberto Papa** <sup>2</sup>,  
**Valerio Di Vittori** <sup>2</sup>, **Luca De Antoni** <sup>1</sup>, **Elisa Bellucci** <sup>2</sup>, **Alice Pieri** <sup>2</sup>, **Elena Bitocchi** <sup>2</sup>,  
**Massimo Delledonne** <sup>1,3,\*</sup> and **Marzia Rossato** <sup>1,3,\*</sup>

<sup>1</sup> Department of Biotechnology, University of Verona, Strada Le Grazie 15, 37134 Verona, Italy

<sup>2</sup> Department of Agricultural, Food and Environmental Sciences, Polytechnic University of Marche, via Brecce Bianche, 60131 Ancona, Italy

<sup>3</sup> Genartis srl, Via IV Novembre 24, 37126 Verona, Italy

\* Correspondence: massimo.delledonne@univr.it (M.D.); marzia.rossato@univr.it (M.R.);  
Tel.: +39-0458027800 (M.R.)

† These authors contributed equally to this work.

## Supplementary Material

**Figure S1. Workflow of analysis. (A)** *De novo* assembly workflow utilized in the study to reconstruct the shattering-associated region in the Midas cultivar, either using the Cas9-tiling or the traditional WGS approach. The assembly generated from Cas9-tiling data was compared with the ROI of the *P. vulgaris* reference genome and the WGS-derived assembly. **(B)** Illumina WGS data were mapped either on the *P. vulgaris* reference genome or on the *P. vulgaris* reference where the Cas9-assembly replaced the ROI. Number of read mapping and genotypability were evaluated in the whole ROI and on genes present in the ROI.

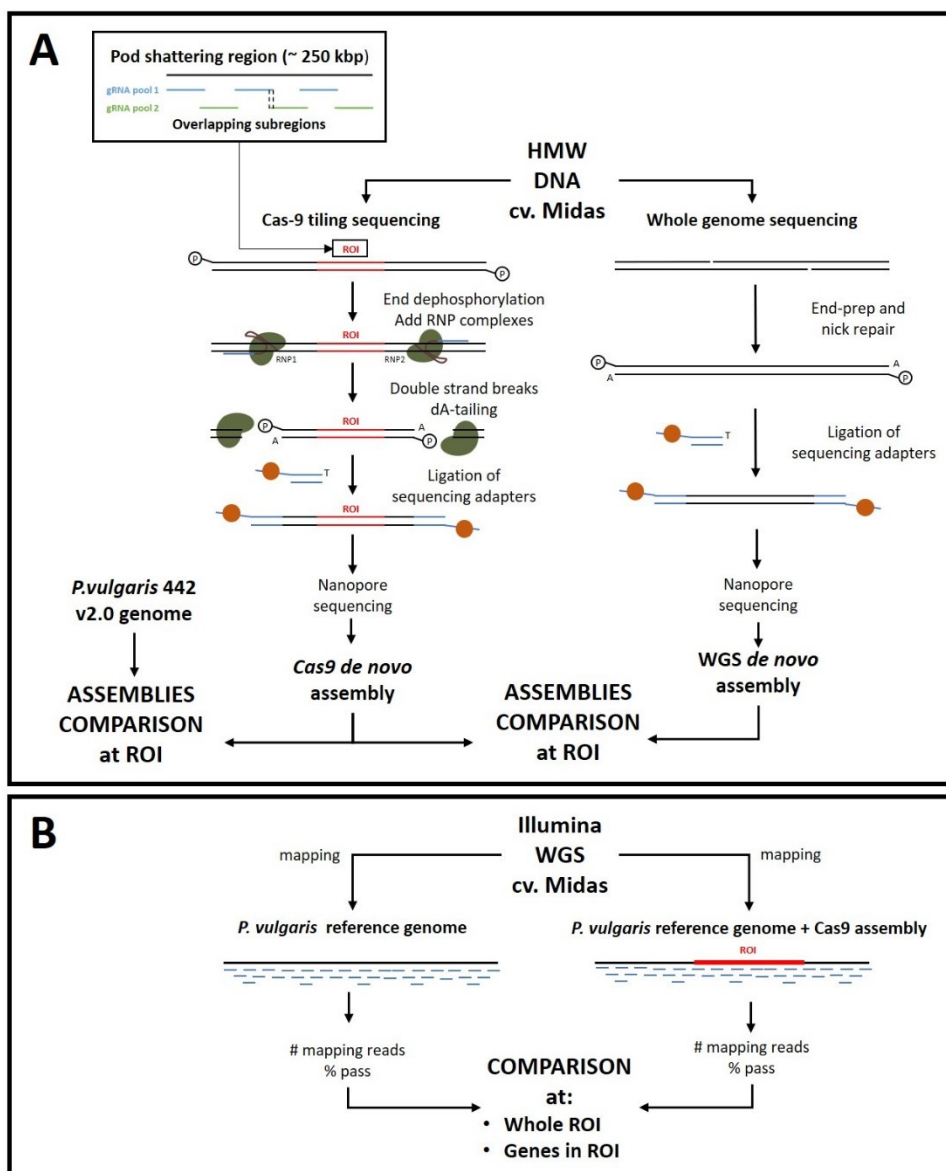

**Figure S2. Design of gRNAs for Cas9 tiling of the pod-shattering region.** Integrative Genome Browser Visualization (IGV) of the pod-shattering region showing the tracks of the five overlapping sub-ROIs cut by pairs of flanking Cas9-gRNA complexes. The protospacer sequences were designed to target genomic regions annotated with genes (red tracks). Sub-ROIs 1, 3, 5 (green tracks), 2 and 4 (blue tracks) were enriched in two parallel reactions.

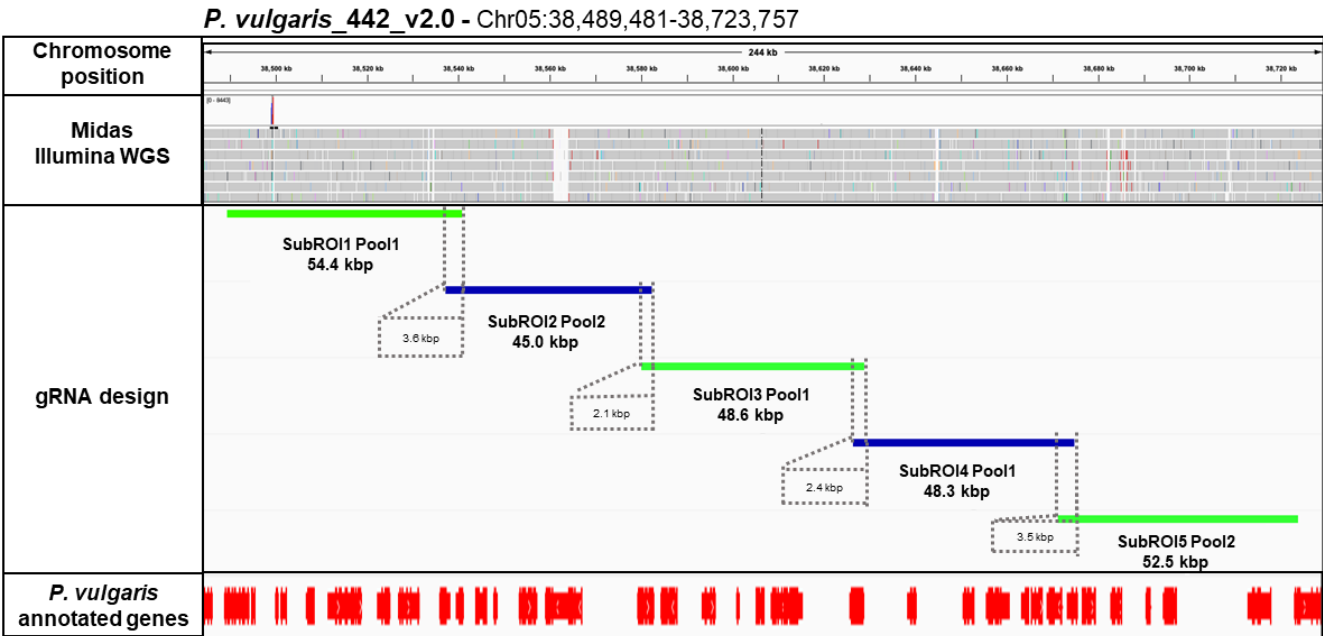

**Figure S3. The pod-shattering region features a large number of variations, some of which overlap genes, when comparing the Midas cultivar and *P. vulgaris* reference genome. (A-B) Integrative Genome Browser Visualization (IGV) of the Cas9 assembly and Midas Illumina WGS reads aligned to the *P. vulgaris* reference genome revealing the detailed tracks of SNVs and SVs identified in the Cas9 assembly compared to the reference genome and the annotated genes (Phvul.005G156200.1.p and Phvul.005G158300.1.p, respectively). (C-D) IGV of Midas Illumina WGS reads aligned to the Cas9 assembly in the region including the orthologous gene shown in panels A and B.**

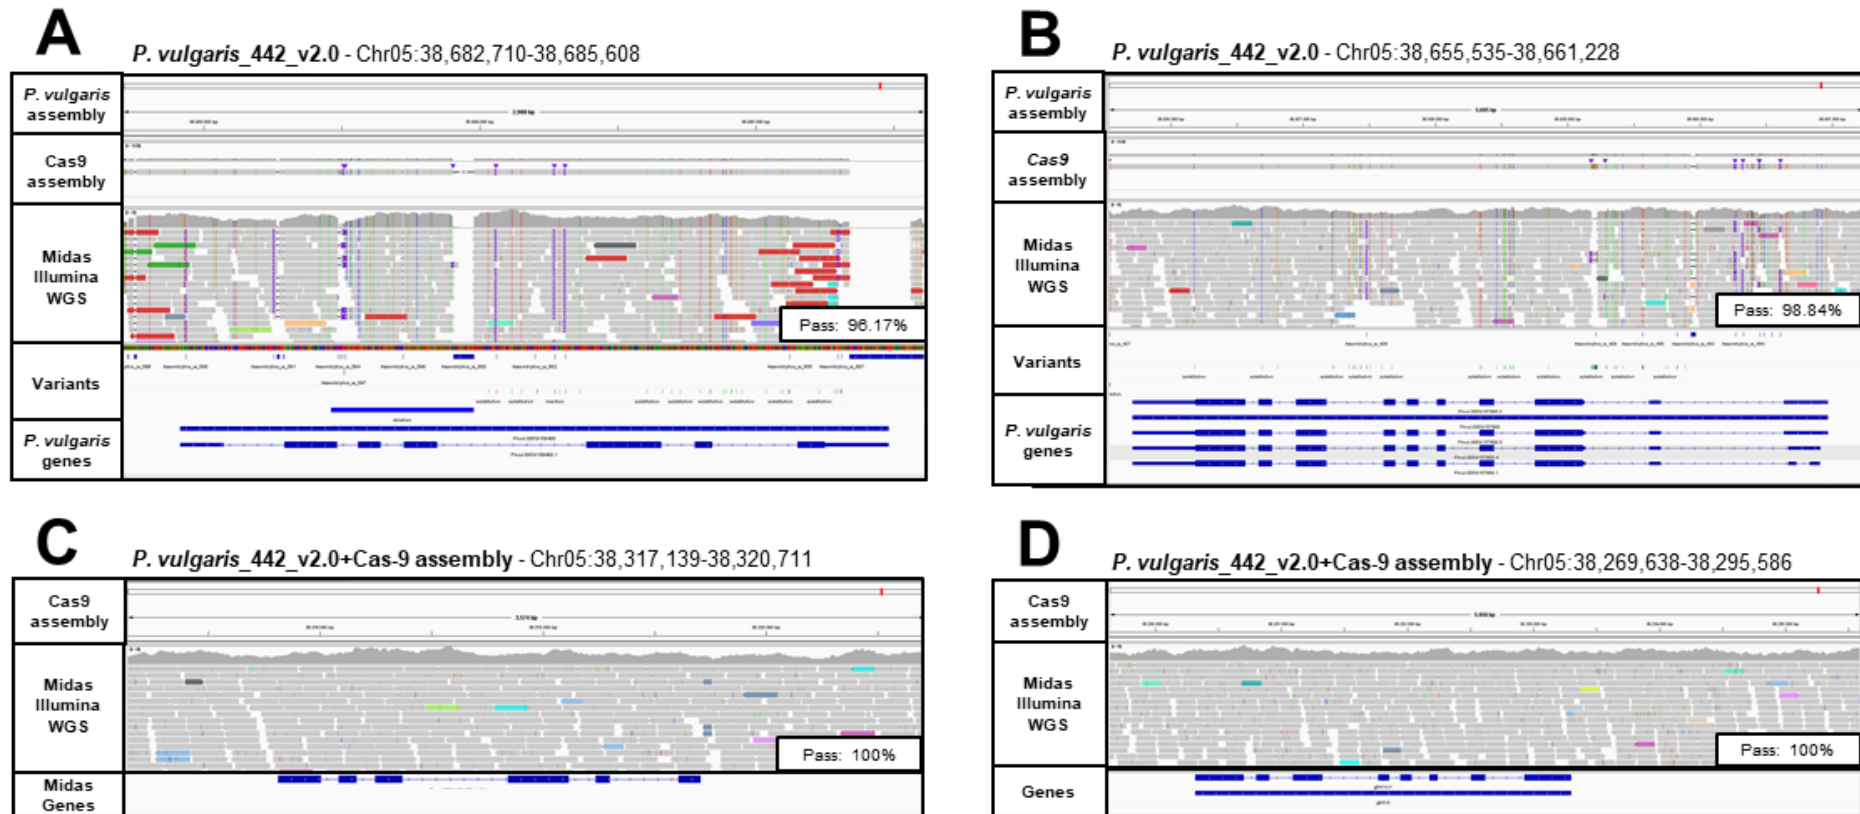

Supplement: s1 [file s1]
